# Supplementary material for: Protoplast Dissociation and Transcriptome Analysis Provides Insights to Salt Stress Response in Cotton
Source: MDPI journal article supplement (doi:10.3390/ijms23052845), 2022-03-05
Supplement: s1 [file s1]

**Table S1.** The expression of DEGs (FPKM) involved in hormone signal transduction pathways in B-YZ150-0.5 vs B-YZ-1.

| Gene_ID   | B-YZ-1      | B-YZ150-0.5 | Description                                                                |
|-----------|-------------|-------------|----------------------------------------------------------------------------|
| Ga05G3322 | 25.57371881 | 9.716549987 | abscisic acid receptor PYL4-like                                           |
| Ga06G1976 | 53.83743675 | 14.70281589 | abscisic acid receptor PYL4-like                                           |
| Ga09G2000 | 108.7117546 | 41.48460459 | abscisic acid receptor PYL4-like                                           |
| Ga11G3815 | 66.78363899 | 33.77376668 | abscisic acid receptor PYR1-like                                           |
| Ga14G0161 | 14.2353155  | 38.36601993 | abscisic acid-insensitive 5-like protein 4                                 |
| Ga05G2155 | 22.70095647 | 59.82489037 | ABSCISIC ACID-INSENSITIVE 5-like protein 5                                 |
| Ga01G1210 | 8.173722958 | 16.76218109 | auxin response factor 5-like isoform X2                                    |
| Ga03G2582 | 5.479198635 | 1.222000419 | auxin-induced protein 15A                                                  |
| Ga05G2726 | 5.319301088 | 1.855757744 | auxin-induced protein 15A-like                                             |
| Ga13G2114 | 286.6109818 | 96.43372682 | auxin-induced protein 22B-like                                             |
| Ga11G1086 | 252.0634174 | 97.22643683 | auxin-induced protein 22D-like                                             |
| Ga01G1209 | 5.752395076 | 20.08282563 | auxin-induced protein 6B-like                                              |
| Ga05G1988 | 3.46285887  | 20.144702   | auxin-induced protein 6B-like                                              |
| Ga05G2728 | 2.692182645 | 6.35828607  | auxin-induced protein 6B-like                                              |
| Ga13G1077 | 3.823815065 | 8.670472195 | auxin-induced protein 6B-like                                              |
| Ga08G2827 | 2.227000813 | 8.347517115 | Auxin-responsive IAA16 -like protein                                       |
| Ga14G1611 | 0.909668536 | 7.379160435 | auxin-responsive protein IAA20-like isoform X1                             |
| Ga07G0455 | 1.711294806 | 8.063905021 | auxin-responsive protein IAA29-like                                        |
| Ga05G0488 | 1.559192158 | 3.256060066 | auxin-responsive protein IAA6-like                                         |
| Ga13G1097 | 5.237786604 | 0.400534769 | auxin-responsive protein SAUR23-like                                       |
| Ga13G1098 | 18.10298989 | 6.373468301 | auxin-responsive protein SAUR23-like                                       |
| Ga07G0578 | 4.171007644 | 10.75452944 | auxin-responsive protein SAUR40                                            |
| Ga14G1872 | 6.323443594 | 1.92739558  | auxin-responsive protein SAUR72-like                                       |
| Ga13G0579 | 2.326574605 | 5.236785468 | BRASSINOSTEROID INSENSITIVE 1-associated receptor kinase 1-like            |
| Ga13G0575 | 1.460967382 | 8.875397204 | BRASSINOSTEROID INSENSITIVE 1-associated receptor kinase 1-like isoform X1 |
| Ga07G0442 | 14.1799664  | 40.5368136  | EIN3-binding F-box protein 1-like                                          |
| Ga03G0447 | 6.559928856 | 24.80320072 | ethylene-responsive transcription factor 1B-like                           |
| Ga11G1037 | 0.127924426 | 1.216932521 | ethylene-responsive transcription factor 1B-like                           |
| Ga11G1039 | 0.582010574 | 3.678440583 | ethylene-responsive transcription factor 1B-like                           |
| Ga11G2673 | 3.129061137 | 45.77286782 | ethylene-responsive transcription factor 1B-like                           |
| Ga12G2846 | 32.33397595 | 66.53658505 | gibberellin receptor GID1B-like                                            |
| Ga11G0935 | 40.03841371 | 14.41277103 | gibberellin receptor GID1C-like                                            |

|           |             |             |                                                                 |
|-----------|-------------|-------------|-----------------------------------------------------------------|
| Ga13G2169 | 18.86786539 | 7.023892009 | gibberellin receptor GID1C-like                                 |
| Ga02G0914 | 2.880605506 | 6.773327207 | histidine kinase 3-like                                         |
| Ga08G0541 | 5.618528107 | 21.04439736 | hypothetical protein B456_004G057100                            |
| Ga13G0042 | 6.753550563 | 17.53769702 | hypothetical protein F383_22932                                 |
| Ga13G1538 | 3.032886593 | 0.902947473 | hypothetical protein GOBAR_AA00105                              |
| Ga03G2604 | 12.72810278 | 0.228984943 | hypothetical protein GOBAR_AA04603                              |
| Ga03G0408 | 51.86866869 | 168.0951199 | hypothetical protein GOBAR_AA09893                              |
| Ga05G1986 | 1.043787467 | 6.832476141 | hypothetical protein GOBAR_AA12303                              |
| Ga08G0540 | 0.252282554 | 3.356802477 | hypothetical protein GOBAR_AA23749                              |
| Ga01G0063 | 2.159505592 | 5.224609707 | hypothetical protein GOBAR_AA30878                              |
| Ga11G1036 | 0.152130725 | 2.501173042 | hypothetical protein GOBAR_AA35152                              |
| Ga06G0191 | 5.855253177 | 2.832967938 | hypothetical protein GOBAR_AA38614                              |
| Ga14G1871 | 4.162804236 | 0.921461676 | hypothetical protein GOBAR_DD00296                              |
| Ga11G0590 | 2.612169098 | 1.312980166 | indole-3-acetic acid-amido synthetase<br>GH3.17-like isoform X1 |
| Ga01G0771 | 35.66580794 | 15.69854883 | indole-3-acetic acid-amido synthetase<br>GH3.6                  |
| Ga08G2892 | 63.23242192 | 263.8648874 | JAZ4, partial                                                   |
| Ga03G2040 | 5.389792852 | 28.57753897 | JAZ8, partial                                                   |
| Ga11G3574 | 0.401260164 | 1.008803993 | probable indole-3-acetic acid-amido<br>synthetase GH3.1         |
| Ga13G0436 | 1.80713595  | 8.939137362 | probable indole-3-acetic acid-amido<br>synthetase GH3.1         |
| Ga05G0980 | 0.146056243 | 3.254513037 | probable protein phosphatase 2C 24                              |
| Ga04G2111 | 0.899425402 | 11.34766543 | probable protein phosphatase 2C 51                              |
| Ga09G2061 | 0.308903834 | 17.22603326 | probable protein phosphatase 2C 51                              |
| Ga12G0287 | 0.031217386 | 0.974121785 | probable protein phosphatase 2C 8<br>isoform X1                 |
| Ga10G0262 | 21.58417622 | 82.96984927 | protein phosphatase 2C 37-like                                  |
| Ga06G0678 | 0.645500471 | 3.184808462 | protein phosphatase 2C 56-like                                  |
| Ga13G2432 | 2.771613767 | 6.340402512 | protein phosphatase 2C 56-like                                  |
| Ga08G2885 | 2.073792023 | 20.10591303 | protein phosphatase 2C 77 isoform X1                            |
| Ga07G0142 | 39.07855425 | 90.80293248 | Protein phosphatase 2C 77 -like protein                         |
| Ga05G0370 | 25.67464839 | 127.0726337 | Protein TIFY 10A -like protein                                  |
| Ga06G0838 | 36.86232083 | 89.33816111 | Protein TIFY 10A -like protein                                  |
| Ga05G1477 | 6.894417099 | 44.37328635 | protein TIFY 11B-like                                           |
| Ga10G2484 | 62.86850952 | 275.3061493 | protein TIFY 11B-like                                           |
| Ga02G0989 | 11.99416917 | 43.61655102 | Protein TIFY 6B -like protein                                   |
| Ga01G0229 | 37.83648341 | 114.8232399 | protein TIFY 9                                                  |
| Ga08G1506 | 29.54229061 | 65.53856121 | putative indole-3-acetic acid-amido<br>synthetase GH3.5         |
| Ga12G0156 | 2.594168555 | 8.316758609 | putative phosphatase 2C 75 -like protein                        |
| Ga08G1465 | 0.7303442   | 1.553998262 | transcription factor MYC2-like                                  |
| Ga08G1846 | 26.83925248 | 56.0032048  | transcription factor MYC2-like                                  |

|           |             |             |                                                        |
|-----------|-------------|-------------|--------------------------------------------------------|
| Ga07G1467 | 0.478405844 | 1.089155799 | transcription factor PIL1-like                         |
| Ga10G0918 | 15.37183088 | 6.913112271 | two-component response regulator<br>ARR17              |
| Ga01G0301 | 0.143823073 | 4.028018887 | Two-component response regulator<br>ARR2 -like protein |
| Ga04G1967 | 92.94036542 | 34.51041877 | two-component response regulator<br>ARR8-like          |
| Ga06G0445 | 0.521606584 | 1.430815138 | two-component response regulator<br>ORR9-like          |
| Ga11G1865 | 7.525045998 | 19.90395736 | Uncharacterized protein F383_10696                     |

---

**Table S2.** The expression of DEGs (FPKM) involved in hormone signal transduction pathways in A-YZ150-0.5 vs A-YZ-1.

| Gene_ID   | A-YZ-1      | A-YZ150-0.5 | Description                                             |
|-----------|-------------|-------------|---------------------------------------------------------|
| Ga06G1976 | 32.0849278  | 7.148303846 | abscisic acid receptor PYL4-like                        |
| Ga11G3045 | 4.487152858 | 33.87561061 | abscisic acid receptor PYL9-like                        |
| Ga06G0409 | 1.508315296 | 11.54122581 | auxin transporter-like protein 3                        |
| Ga03G2582 | 19.81843306 | 0.460543558 | auxin-induced protein 15A                               |
| Ga09G2536 | 29.21172993 | 95.73814868 | auxin-induced protein 22D-like                          |
| Ga05G1345 | 8.489909637 | 47.26299063 | auxin-induced protein AUX22-like                        |
| Ga06G2298 | 0.173683233 | 2.976303127 | auxin-induced protein AUX22-like                        |
| Ga05G1383 | 0.999339594 | 5.011463228 | Auxin-responsive IAA27 -like protein                    |
| Ga07G1711 | 1.649394261 | 8.774124348 | auxin-responsive protein IAA11                          |
| Ga08G2252 | 2.539958167 | 35.53806951 | auxin-responsive protein IAA11-like<br>isoform X1       |
| Ga14G1611 | 0           | 4.200040969 | auxin-responsive protein IAA20-like<br>isoform X1       |
| Ga07G0455 | 0.130099914 | 16.16992772 | auxin-responsive protein IAA29-like                     |
| Ga05G3622 | 0           | 1.62772008  | auxin-responsive protein IAA32-like<br>isoform X2       |
| Ga09G2187 | 0.739494829 | 5.604915782 | auxin-responsive protein SAUR36-like                    |
| Ga07G0578 | 1.954992687 | 18.40634963 | auxin-responsive protein SAUR40                         |
| Ga10G2079 | 16.06527904 | 3.647182401 | cyclin-D3-3-like isoform X1                             |
| Ga08G2804 | 3.565260459 | 16.39365045 | EIN3-binding F-box protein 1-like<br>isoform X1         |
| Ga03G0447 | 3.726235532 | 20.84863179 | ethylene-responsive transcription factor<br>1B-like     |
| Ga11G2673 | 0.891420582 | 16.5580022  | ethylene-responsive transcription factor<br>1B-like     |
| Ga03G2704 | 5.291331032 | 22.04703921 | G-box-binding factor 4-like                             |
| Ga12G2846 | 11.1682482  | 127.060473  | gibberellin receptor GID1B-like                         |
| Ga03G1680 | 5.711896004 | 30.04944182 | Histidine kinase 3 -like protein                        |
| Ga13G2710 | 240.5376747 | 68.81351707 | hypothetical protein GOBAR_AA06134                      |
| Ga03G0408 | 15.89866853 | 129.7393006 | hypothetical protein GOBAR_AA09893                      |
| Ga14G1871 | 13.65854285 | 1.048500379 | hypothetical protein GOBAR_DD00296                      |
| Ga04G1834 | 4.808233722 | 18.65009571 | indole-3-acetic acid-amido synthetase<br>GH3.17-like    |
| Ga08G2892 | 10.83360274 | 213.979599  | JAZ4, partial                                           |
| Ga09G1168 | 0.099531909 | 5.143417533 | pathogenesis-related protein 1-like                     |
| Ga03G2421 | 2.097233041 | 149.7959517 | probable indole-3-acetic acid-amido<br>synthetase GH3.1 |
| Ga11G3574 | 0.113482788 | 52.72009796 | probable indole-3-acetic acid-amido<br>synthetase GH3.1 |
| Ga04G2111 | 0.014604842 | 14.35808369 | probable protein phosphatase 2C 51                      |
| Ga09G2061 | 0           | 79.43846533 | probable protein phosphatase 2C 51                      |

|           |             |             |                                                          |
|-----------|-------------|-------------|----------------------------------------------------------|
| Ga05G1071 | 37.90288949 | 115.9121314 | protein ETHYLENE INSENSITIVE 3                           |
| Ga10G0262 | 4.68145746  | 53.73696313 | protein phosphatase 2C 37-like                           |
| Ga07G0142 | 16.97802322 | 71.18168524 | Protein phosphatase 2C 77 -like protein                  |
| Ga05G0370 | 7.020978914 | 55.39866476 | Protein TIFY 10A -like protein                           |
| Ga10G2484 | 39.04210483 | 139.299683  | protein TIFY 11B-like                                    |
| Ga01G0229 | 4.662374643 | 62.36018527 | protein TIFY 9                                           |
| Ga08G0500 | 1.578560014 | 5.896528275 | protein TRANSPORT INHIBITOR<br>RESPONSE 1-like           |
| Ga08G1506 | 5.528043096 | 26.82749451 | putative indole-3-acetic acid-amido<br>synthetase GH3.5  |
| Ga08G1915 | 7.236022336 | 22.4258122  | serine/threonine-protein kinase<br>SAPK3-like isoform X2 |
| Ga04G0521 | 1.857150137 | 0.036747842 | transcription factor APG-like                            |
| Ga08G1846 | 3.374685442 | 12.94582425 | transcription factor MYC2-like                           |
| Ga11G1582 | 0           | 1.196082933 | transcription factor TGA1-like isoform<br>X2             |
| Ga09G1125 | 2.408489391 | 11.72147366 | transcription factor TGA2-like isoform<br>X1             |
| Ga07G0312 | 2.888025789 | 10.33673675 | two-component response regulator<br>ARR12-like           |
| Ga04G1967 | 57.08486598 | 10.82870904 | two-component response regulator<br>ARR8-like            |
| Ga13G0087 | 80.19486873 | 17.54172014 | two-component response regulator<br>ORR10                |

---

**Table S3.** The expression of DEGs (FPKM) involved in MAPK signaling pathways in B-YZ150-0.5 vs B-YZ-1.

| Gene_ID   | B-YZ-1      | B-YZ150-0.5 | Description                                                                      |
|-----------|-------------|-------------|----------------------------------------------------------------------------------|
| Ga05G3322 | 25.57371881 | 9.716549987 | abscisic acid receptor PYL4-like                                                 |
| Ga06G1976 | 53.83743675 | 14.70281589 | abscisic acid receptor PYL4-like                                                 |
| Ga09G2000 | 108.7117546 | 41.48460459 | abscisic acid receptor PYL4-like                                                 |
| Ga11G3815 | 66.78363899 | 33.77376668 | abscisic acid receptor PYR1-like                                                 |
| Ga13G0579 | 2.326574605 | 5.236785468 | BRASSINOSTEROID INSENSITIVE<br>1-associated receptor kinase 1-like               |
| Ga13G0575 | 1.460967382 | 8.875397204 | BRASSINOSTEROID INSENSITIVE<br>1-associated receptor kinase 1-like<br>isoform X1 |
| Ga10G1008 | 60.04367576 | 273.6856357 | calmodulin-like                                                                  |
| Ga07G0442 | 14.1799664  | 40.5368136  | EIN3-binding F-box protein 1-like                                                |
| Ga03G0447 | 6.559928856 | 24.80320072 | ethylene-responsive transcription factor<br>1B-like                              |
| Ga11G1037 | 0.127924426 | 1.216932521 | ethylene-responsive transcription factor<br>1B-like                              |
| Ga11G1039 | 0.582010574 | 3.678440583 | ethylene-responsive transcription factor<br>1B-like                              |
| Ga11G2673 | 3.129061137 | 45.77286782 | ethylene-responsive transcription factor<br>1B-like                              |
| Ga08G0541 | 5.618528107 | 21.04439736 | hypothetical protein B456_004G057100                                             |
| Ga08G2134 | 0.118132569 | 0.397990333 | hypothetical protein GOBAR_AA20802                                               |
| Ga08G0540 | 0.252282554 | 3.356802477 | hypothetical protein GOBAR_AA23749                                               |
| Ga14G1704 | 2.586927503 | 0.214074975 | hypothetical protein GOBAR_AA29146                                               |
| Ga01G0063 | 2.159505592 | 5.224609707 | hypothetical protein GOBAR_AA30878                                               |
| Ga04G1601 | 35.71564796 | 116.8920483 | hypothetical protein GOBAR_AA31266                                               |
| Ga11G1036 | 0.152130725 | 2.501173042 | hypothetical protein GOBAR_AA35152                                               |
| Ga05G2467 | 7.606610451 | 19.04717426 | mitogen-activated protein kinase kinase<br>kinase 1-like                         |
| Ga12G1054 | 6.501517918 | 1.032079805 | probable calcium-binding protein<br>CML30                                        |
| Ga05G3122 | 0.282246268 | 4.199215646 | probable LRR receptor-like<br>serine/threonine-protein kinase<br>At3g47570       |
| Ga05G0980 | 0.146056243 | 3.254513037 | probable protein phosphatase 2C 24                                               |
| Ga04G2111 | 0.899425402 | 11.34766543 | probable protein phosphatase 2C 51                                               |
| Ga09G2061 | 0.308903834 | 17.22603326 | probable protein phosphatase 2C 51                                               |
| Ga12G0287 | 0.031217386 | 0.974121785 | probable protein phosphatase 2C 8<br>isoform X1                                  |
| Ga10G0262 | 21.58417622 | 82.96984927 | protein phosphatase 2C 37-like                                                   |
| Ga06G0678 | 0.645500471 | 3.184808462 | protein phosphatase 2C 56-like                                                   |
| Ga13G2432 | 2.771613767 | 6.340402512 | protein phosphatase 2C 56-like                                                   |

|           |             |             |                                                     |
|-----------|-------------|-------------|-----------------------------------------------------|
| Ga08G2885 | 2.073792023 | 20.10591303 | protein phosphatase 2C 77 isoform X1                |
| Ga07G0142 | 39.07855425 | 90.80293248 | Protein phosphatase 2C 77 -like protein             |
| Ga12G0156 | 2.594168555 | 8.316758609 | putative phosphatase 2C 75 -like protein            |
| Ga11G0866 | 20.8974268  | 48.60417264 | respiratory burst oxidase homolog<br>protein B      |
| Ga05G2057 | 5.167486322 | 21.84856216 | respiratory burst oxidase homolog<br>protein D-like |
| Ga05G2754 | 39.00416779 | 111.4533515 | respiratory burst oxidase homolog<br>protein D-like |
| Ga08G1465 | 0.7303442   | 1.553998262 | transcription factor MYC2-like                      |
| Ga08G1846 | 26.83925248 | 56.0032048  | transcription factor MYC2-like                      |
| Ga08G1590 | 14.50186767 | 147.2874472 | WRKY transcription factor 22-like                   |

---

**Table S4.** The expression of DEGs (FPKM) involved in MAPK signaling pathways in A-YZ150-0.5 vs A-YZ-1.

| Gene_ID   | A-YZ-1      | A-YZ150-0.5 | Description                                              |
|-----------|-------------|-------------|----------------------------------------------------------|
| Ga06G1976 | 32.0849278  | 7.148303846 | abscisic acid receptor PYL4-like                         |
| Ga11G3045 | 4.487152858 | 33.87561061 | abscisic acid receptor PYL9-like                         |
| Ga08G2804 | 3.565260459 | 16.39365045 | EIN3-binding F-box protein 1-like<br>isoform X1          |
| Ga03G0447 | 3.726235532 | 20.84863179 | ethylene-responsive transcription factor<br>1B-like      |
| Ga11G2673 | 0.891420582 | 16.5580022  | ethylene-responsive transcription factor<br>1B-like      |
| Ga12G0056 | 1.703225281 | 20.53358448 | hypothetical protein GOBAR_AA23896                       |
| Ga09G1168 | 0.099531909 | 5.143417533 | pathogenesis-related protein 1-like                      |
| Ga04G2111 | 0.014604842 | 14.35808369 | probable protein phosphatase 2C 51                       |
| Ga09G2061 | 0           | 79.43846533 | probable protein phosphatase 2C 51                       |
| Ga05G1071 | 37.90288949 | 115.9121314 | protein ETHYLENE INSENSITIVE 3                           |
| Ga10G0262 | 4.68145746  | 53.73696313 | protein phosphatase 2C 37-like                           |
| Ga07G0142 | 16.97802322 | 71.18168524 | Protein phosphatase 2C 77 -like protein                  |
| Ga08G1915 | 7.236022336 | 22.4258122  | serine/threonine-protein kinase<br>SAPK3-like isoform X2 |
| Ga08G1846 | 3.374685442 | 12.94582425 | transcription factor MYC2-like                           |
| Ga08G1590 | 11.27363926 | 145.1899406 | WRKY transcription factor 22-like                        |



**Table S5.** Classification and number of up-regulated and down-regulated TFs in B-YZ150-0.5 vs B-YZ-1 and A-YZ150-0.5 vs A-YZ-1.

| Name         | B-YZ150-0.5 vs B-YZ-1 |      | A-YZ150-0.5 vs A-YZ-1 |      |
|--------------|-----------------------|------|-----------------------|------|
|              | Up                    | Down | Up                    | Down |
| AP2/ERF-AP2  | 2                     | 0    | 1                     | 1    |
| AP2/ERF-ERF  | 48                    | 11   | 34                    | 6    |
| B3           | 3                     | 2    | 0                     | 1    |
| B3-ARF       | 2                     | 0    | 1                     | 0    |
| BBR-BPC      | 1                     | 0    | 0                     | 1    |
| BES1         | 0                     | 0    | 1                     | 0    |
| bHLH         | 22                    | 7    | 9                     | 7    |
| bZIP         | 6                     | 6    | 10                    | 1    |
| C2C2-CO-like | 1                     | 0    | 3                     | 0    |
| C2C2-Dof     | 9                     | 3    | 4                     | 0    |
| C2C2-GATA    | 3                     | 0    | 0                     | 5    |
| C2H2         | 5                     | 7    | 8                     | 5    |
| C3H          | 3                     | 0    | 0                     | 1    |
| CAMTA        | 2                     | 0    | 0                     | 0    |
| CSD          | 0                     | 1    | 0                     | 3    |
| DBB          | 0                     | 2    | 0                     | 0    |
| E2F-DP       | 0                     | 0    | 0                     | 2    |
| EIL          | 0                     | 0    | 1                     | 0    |
| GARP-ARR-B   | 0                     | 0    | 1                     | 0    |
| GARP-G2-like | 4                     | 2    | 2                     | 2    |
| GeBP         | 0                     | 0    | 0                     | 1    |
| GRAS         | 15                    | 3    | 7                     | 1    |
| GRF          | 2                     | 0    | 0                     | 7    |
| HB-BELL      | 1                     | 2    | 4                     | 0    |
| HB-HD-ZIP    | 6                     | 5    | 6                     | 3    |
| HB-KNOX      | 2                     | 0    | 5                     | 0    |
| HB-other     | 3                     | 0    | 1                     | 0    |
| HB-WOX       | 2                     | 1    | 0                     | 0    |
| HRT          | 2                     | 0    | 0                     | 0    |
| HSF          | 10                    | 0    | 0                     | 3    |
| LIM          | 0                     | 0    | 2                     | 0    |
| LOB          | 6                     | 7    | 5                     | 1    |
| MYB          | 33                    | 12   | 31                    | 3    |
| MYB-related  | 5                     | 6    | 5                     | 1    |
| NAC          | 31                    | 6    | 16                    | 0    |
| NF-X1        | 2                     | 0    | 0                     | 0    |
| NF-YB        | 0                     | 0    | 0                     | 2    |
| NF-YC        | 2                     | 0    | 0                     | 1    |
| OFP          | 0                     | 3    | 1                     | 2    |
| PLATZ        | 1                     | 1    | 3                     | 4    |

|          |    |   |    |   |
|----------|----|---|----|---|
| SAP      | 1  | 0 | 0  | 0 |
| SBP      | 1  | 2 | 0  | 0 |
| SRS      | 2  | 0 | 1  | 1 |
| TCP      | 0  | 2 | 0  | 1 |
| Tify     | 11 | 0 | 6  | 0 |
| Trihelix | 5  | 0 | 0  | 1 |
| TUB      | 1  | 0 | 2  | 0 |
| WRKY     | 36 | 0 | 20 | 0 |
| zf-HD    | 2  | 0 | 0  | 0 |

---

**Table S6.** Primers used for qRT-PCR in this study.

| Primer Names | Primer Sequences (5'–3')     |
|--------------|------------------------------|
| Ub7-F        | 5'- CTCCGAGAACGTCATCACCG-3'  |
| Ub7-R        | 5'- TGGAGCCGTACTGGAAGTGG-3'  |
| Ga06G2480-F  | 5'- CAAAGTCAGCAGCACAGTGG-3'  |
| Ga06G2480-R  | 5'- CTGCATCGACGAGGACTTGTA-3' |
| Ga10G0001-F  | 5'- CGCCGAGCAATTGAACGAAA-3'  |
| Ga10G0001-R  | 5'- ACACCGTGGATCCTTTTCCC-3'  |
| Ga14G0423-F  | 5'- CCATGCCCTGCTTGGAAGTAC-3' |
| Ga14G0423-R  | 5'- TCACAGTGCTACCAGCAAGT-3'  |
| Ga11G1792-F  | 5'- CGCTTCGGGGTTCGATCATA-3'  |
| Ga11G1792-R  | 5'- GACAAGGTTCCGGGACTGAG-3'  |
| Ga11G2202-F  | 5'- TCAGTCAGCTCTCCGAAGGA-3'  |
| Ga11G2202-R  | 5'- ATACTGCTCCTCGTCCTGGT-3'  |
| Ga03G2582-F  | 5'- TCTCACCCCTCCCTTAGACG-3'  |
| Ga03G2582-R  | 5'- GGAAGTCGGGGTGAGTCAAG-3'  |
| Ga12G0273-F  | 5'- CCGAATGTCAAGGCGAAACC-3'  |
| Ga12G0273-R  | 5'- CCGACACCGAGGTGTTGAAA-3'  |
| Ga12G1699-F  | 5'- AATGGAATGTCGGCAGTGGG-3'  |
| Ga12G1699-R  | 5'- CAGGAGCTTCATGGGCAACT-3'  |
| Ga01G2544-F  | 5'- ATGGGACGAGGACTCATGGA-3'  |
| Ga01G2544-R  | 5'- ACCAATCACAGTCCGACACC-3'  |
| Ga02G0200-F  | 5'- TTGCTTTGCCGTTGACTTGG-3'  |
| Ga02G0200-R  | 5'- TTTCCGGCTTGGAGACTCAC-3'  |

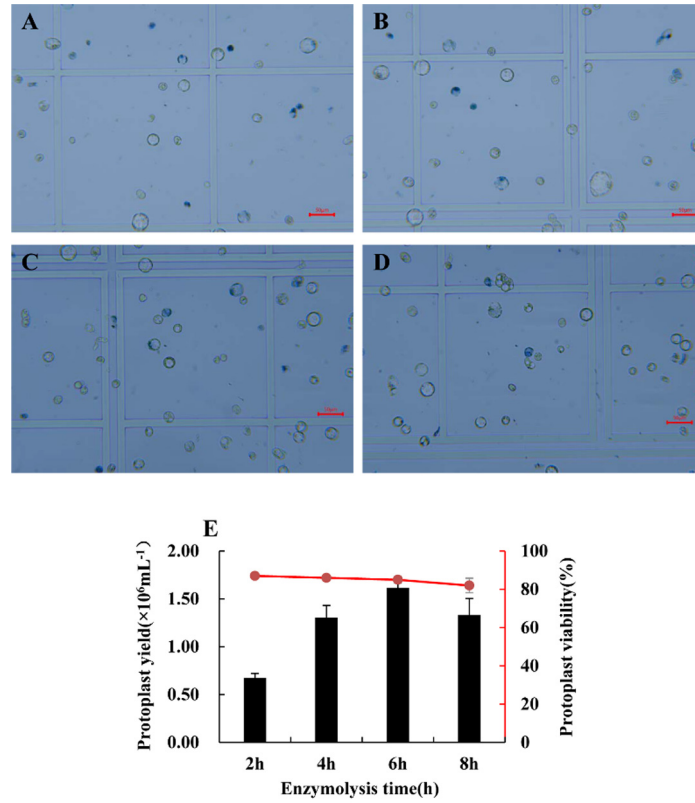

Figure S1 Effects of enzymolysis time on protoplasts isolation from *G. arboreum* lateral root tips. The protoplasts stained with Trypan blue solution, which were isolated from the enzyme digestion for (A) 2 h, (B) 4 h, (C) 6 h and (D) 8 h. Scale bar, 50  $\mu\text{m}$ ; (E) Effects of enzymolysis time on the yield and viability of protoplasts isolated from the cotton lateral root tips; data presented as means of three biological replicates with error bars indicating standard deviations (SD). The bar graph represents protoplast yield ( $\times 10^6$ ) and the red broken line graph represents protoplast viability (%).

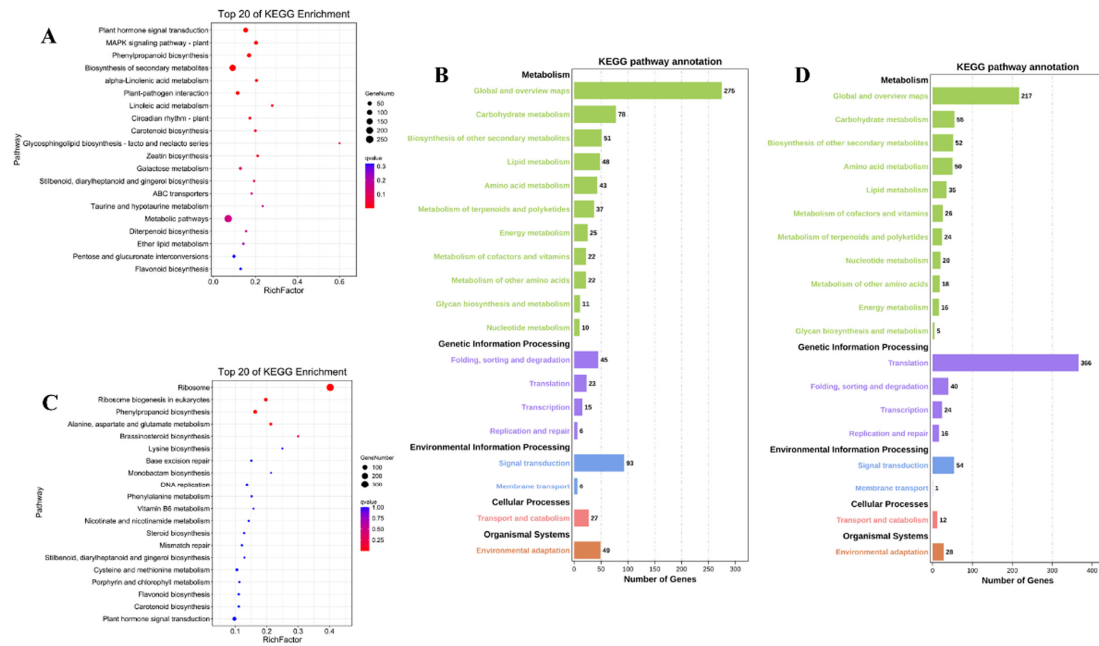

Figure S2 The Kyoto Encyclopedia of Genes and Genomes (KEGG) pathways analysis and the top 20 enriched pathways of DEGs in (A) B-YZ150-0.5 vs B-YZ-1 and (B) A-YZ150-0.5 vs A-YZ-1 and their pathways in (C) B-YZ150-0.5 vs B-YZ-1 and (D) A-YZ150-0.5 vs A-YZ-1.
